# Supplementary material for: Ameliorating process parameters for zeaxanthin yield in Arthrobacter gandavensis MTCC 25325
Source: PubMed Central journal article supplement (PMC7158978; doi:10.1186/s13568-020-01008-4), 2020-04-15
Supplement: 13568_2020_1008_MOESM1_ESM.pdf [file 13568_2020_1008_MOESM1_ESM.pdf]

**Journal name: AMB Express**

**Ameliorating process parameters for zeaxanthin yield in *Arthrobacter gandavensis* MTCC 25325**

Shristi Ram<sup>a,b</sup>, Sushma Rani Tirkey<sup>a,b</sup>, Madhava Anil Kumar<sup>a,c</sup>, Sandhya Mishra<sup>a,b\*</sup>

<sup>a</sup>Academy of Scientific and Innovative Research (AcSIR), Ghaziabad-201 002, India.

<sup>b</sup>Applied Phycology & Biotechnology Division, CSIR-Central Salt & Marine Chemicals Research Institute, Bhavnagar – 364 002, India.

<sup>c</sup>Analytical and Environmental Science Division & Centralized Instrument Facility, CSIR-Central Salt & Marine Chemicals Research Institute, Bhavnagar-364 002, India .

\*Author for correspondence

Dr. Sandhya Mishra

Emeritus Scientist

Applied Phycology & Biotechnology Division

CSIR-Central Salt & Marine Chemicals Research Institute

Bhavnagar-364 002, Gujarat, India

Tel: +91 278 256 5801 / 256 3805 Extn. 6160

Fax: + 91 278 256 6970 / 256 7562

Email address: [smishra@csmcri.res.in](mailto:smishra@csmcri.res.in)

ORCID iD: 0000-0002-2412-4927

## Additional File

**Table S1** General characteristics of bacterial isolates showing zeaxanthin production

| Isolate name | Gram staining | Sampling site                 | 16s rRNA gene sequencing            | Total carotenoid content (µg/g) | Accession number |
|--------------|---------------|-------------------------------|-------------------------------------|---------------------------------|------------------|
| SR9          | +             | CSMCRI-ESF                    | <i>Kocuria flava</i>                | 85.11                           | --               |
| SR2          | +             | Somnath                       | <i>Rhodococcus ruber</i>            | 37.96                           | --               |
| SR3          | +             | Okha road                     | <i>Planococcus maritimus</i>        | 158.92                          | MF276799         |
| SR4          | +             | CSMCRI-Experimental Salt Farm | <i>Planomicrobium okeanoikoites</i> | 75.48                           | MF276800         |
| SR6          | +             | Gangeshwar                    | <i>Kocuria</i> sp.                  | 136.06                          | MF276789         |
| SR10         | +             | Bor-Talav                     | <i>Arthrobacter gandavensis</i>     | 234.95                          | MH544097.1       |

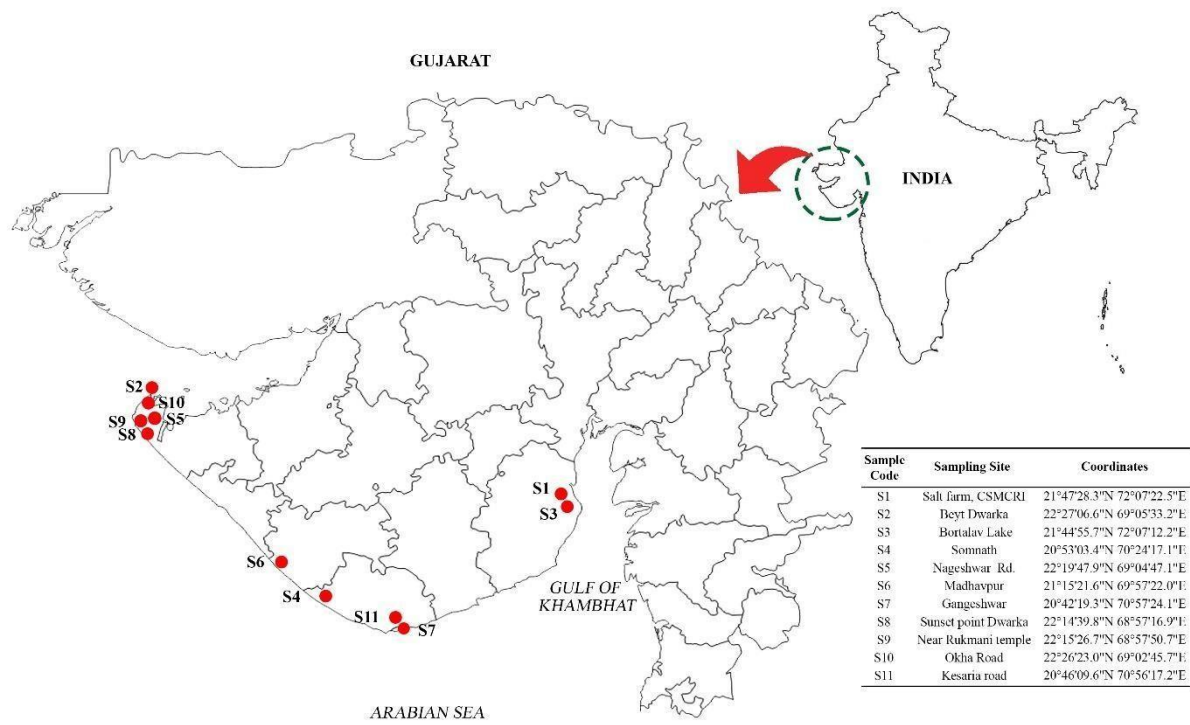

**Fig. S1** Sampling location of pigmented bacterial isolates screened for zeaxanthin production
